# Supplementary figures and images for: Structural, magnetic and electronic properties of iron doped barium strontium titanate
Source: Royal Society of Chemistry journal article supplement (doi:10.1039/c6ra21458d), 2016-01-01

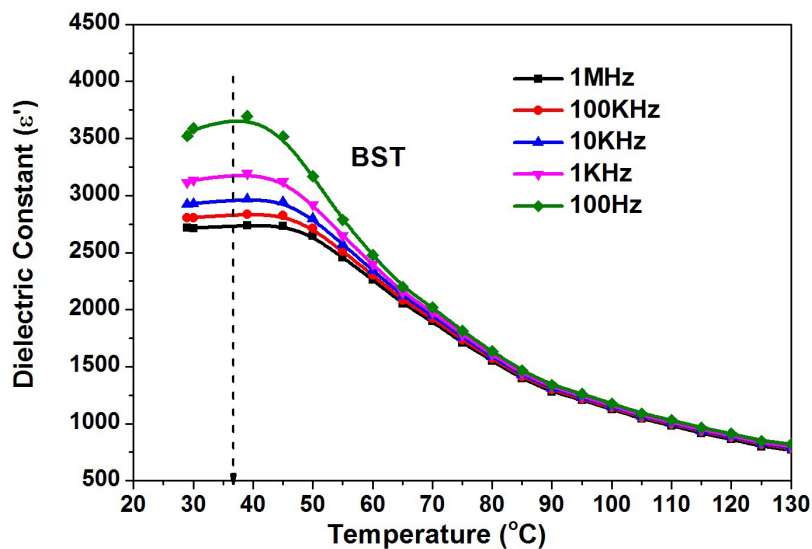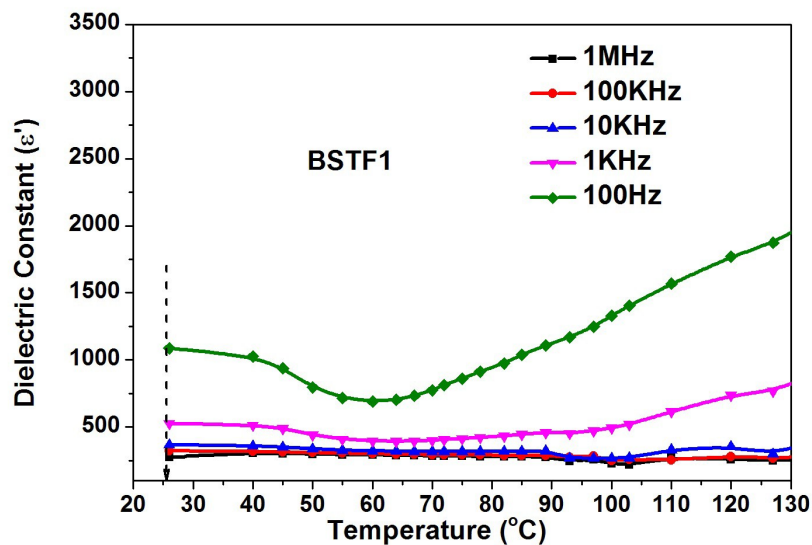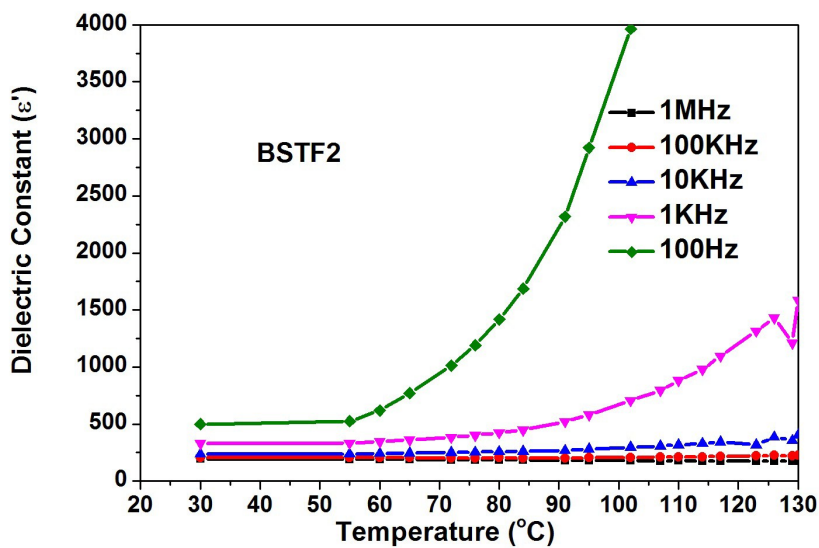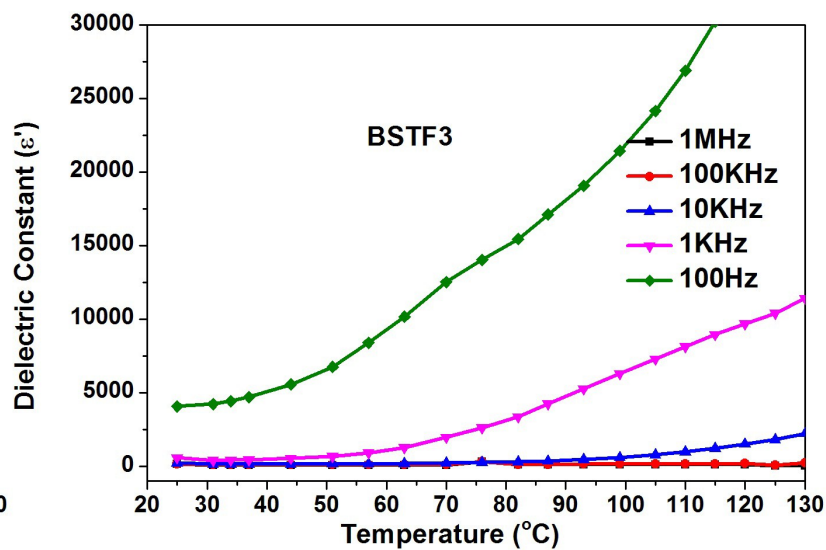

Supplement: c6ra21458d1.pdf [file c6ra21458d1.pdf]
